# Supplementary material for: A prospective study assessing the pattern of response of local disease at DCE-MRI after salvage radiotherapy for prostate cancer
Source: Research Square preprint supplement (doi:10.21203/rs.3.rs-1350793/v1), 2022-02-16
Supplement: Supplementary file 1 [file 35b05dfb8fae8eac44345738.docx]

Supplementary Figure 1. Response at rDCE-MRI for 62 patients sorted by the time to first rescan. Each dot represents a scan. Blue: Complete Response; Yellow: Partial Response; Red: No Response. See text for definition of response. The black arrows indicate patients who were not further scanned despite a partial response.

Supplementary Table 1. Selected patient-, tumor- and treatment-characteristics

| Characteristic | Stratification | #/median | %/IQR |
| --- | --- | --- | --- |
| Age (yrs) | Continuum | 69.7 | 65.9-73.6 |
| pT @ RP | pT2 (%) | 36 | 58.06 |
| pT3a (%) | 20 | 32.26 |
| pT3b (%) | 6 | 9.68 |
| Margins at RP | R0 (%) | 26 | 41.94 |
| R1 (%) | 36 | 58.06 |
| PSA @ fail (ng/ml) | Continuum | 0.44 | 0.35-0.87 |
| PSADT (mths) | Continuum | 10.6 | 5.2-20.7 |
| Time between RP and sRT (mths) | Continuum | 52.4 | 25.35-90.95 |
| GGG | 1 (%) | 5 | 8.07 |
| 2 or 3 (%) | 49 | 79.03 |
| 4 or 5 (%) | 8 | 12.9 |
| Location of the nodule* | Anastomotic* | 39 | 62.9 |
|  | Bladder neck | 17 | 27.3 |
|  | Retrovesical^ | 16 | 25.8 |
| # of local lesions | 1 | 53 | 85.5 |
|  | 2 | 8 | 12.9 |
|  | 3 | 1 | 1.6 |
| Volume at baseline MRI (cc) | Continuum | 1.23 | 0.13-0.59 |
| PSA decrease at week 5 (%) | Continuum | 48.8 | 32.5-67.2 |
| Elective Pelvic Node treatment | No | 33 | 53.2% |
|  | Yes | 29 | 46.8% |

Abbreviations: FU, follow up; RP, radical prostatectomy; sRT, salvage radiotherapy; CR, complete response; NR, no response; GGG: Gleason Grade Grouping; RP, radical prostatectomy; SD, standard deviation; PSADT, PSA doubling time

*2 patients had two failures at the anastomosis

^1 patient had two failures at the retrovesical space
